# Supplementary material for: Eco-Sustainability of Soils in Baby-Leaf Crop Systems under Tunnel through the Application of C-Rich Inputs: Towards Combating Soil Degradation
Source: MDPI journal article supplement (doi:10.3390/horticulturae10050476), 2024-05-07
Supplement: s1 [file s1]

**Figure S1** dsDNA and enzymatic activities (mean  $\pm$  s.d.), arylsulfatase (AryS),  $\beta$ -glucosidase (betaG), chitinase (chit), leucine aminopeptidase (leu), acid- and alkaline-phosphomonoesterase (acP and alkP), phosphodiesterase (bisP), pyrophosphate-phosphodiesterase (piroP) and phytase (inositP) showed as temporal dynamics in CNT = Control, BWcom15 and BWcom30 = biowaste compost 15 Mg ha<sup>-1</sup> and 30 Mg ha<sup>-1</sup>, OPCmix15 and OPCmix30 = mixed olive pomace compost 15 Mg ha<sup>-1</sup> and 30 Mg ha<sup>-1</sup>, OPC15 and OPC30 = Olive pomace compost 15 Mg ha<sup>-1</sup> and 30 Mg ha<sup>-1</sup>, BMan15 and BMan30 = buffalo manure 15 Mg ha<sup>-1</sup> and 30 Mg ha<sup>-1</sup> treatments.

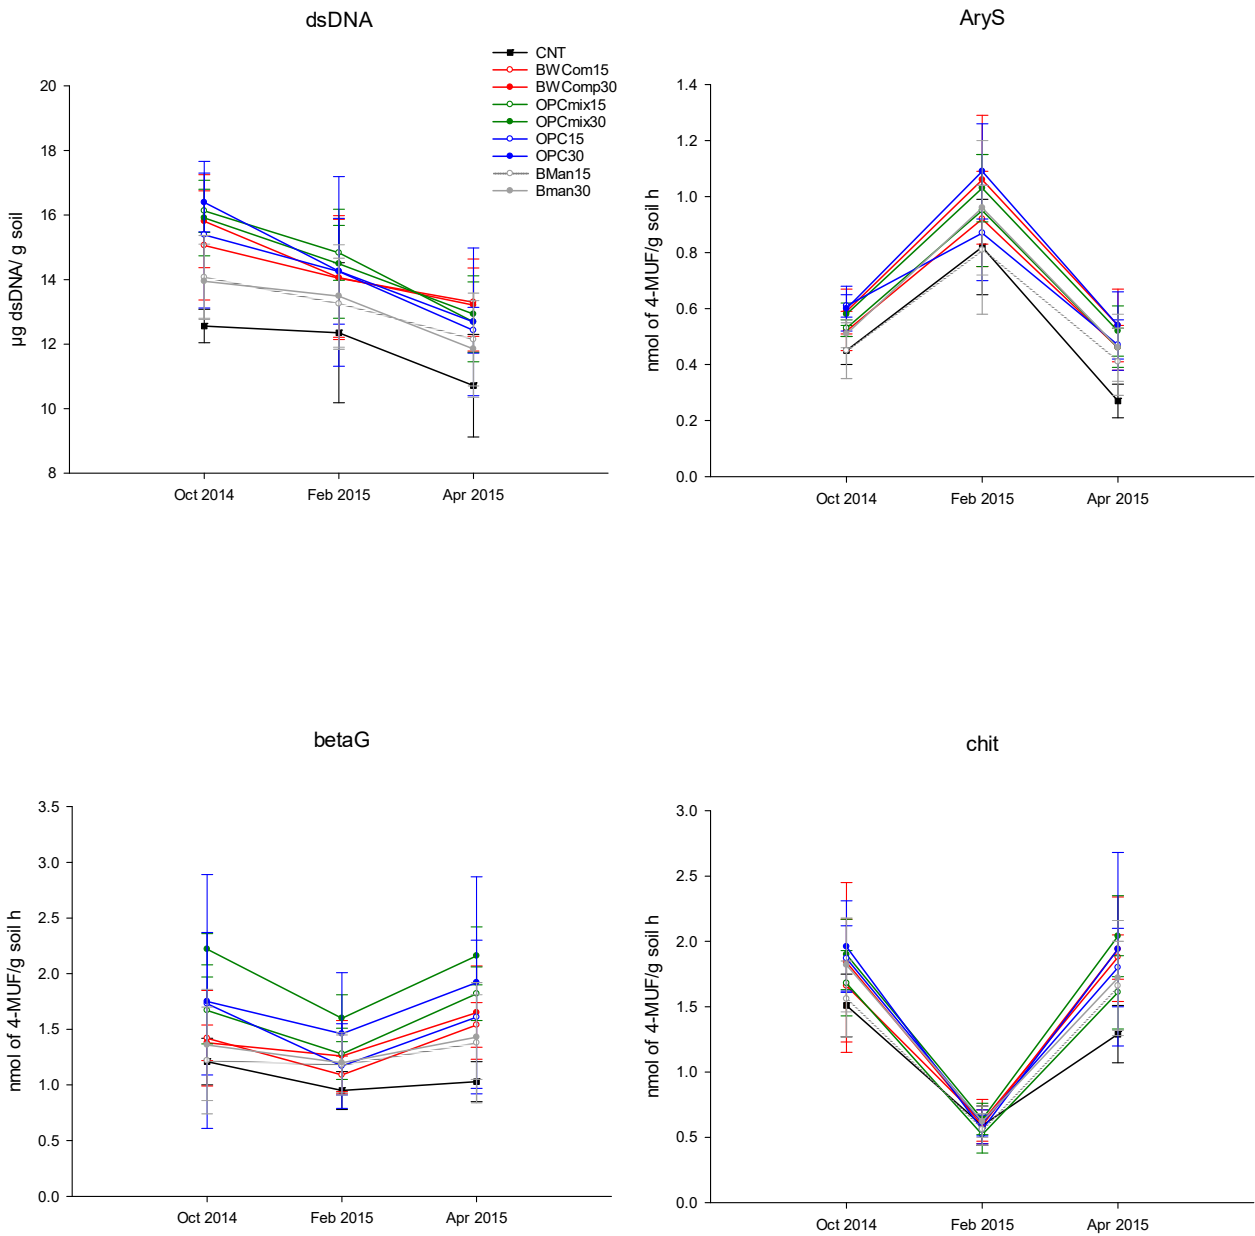

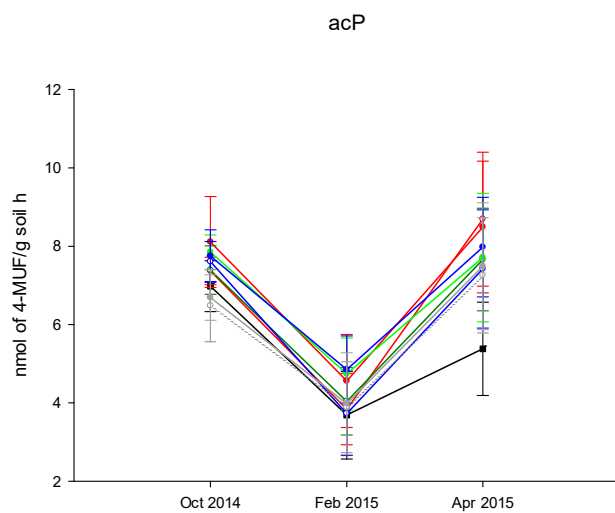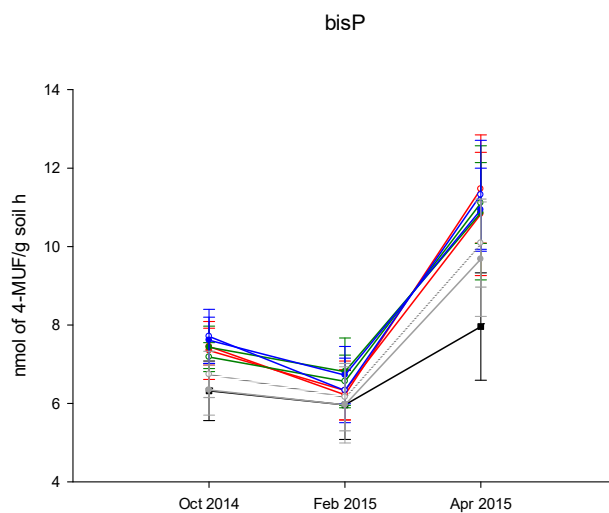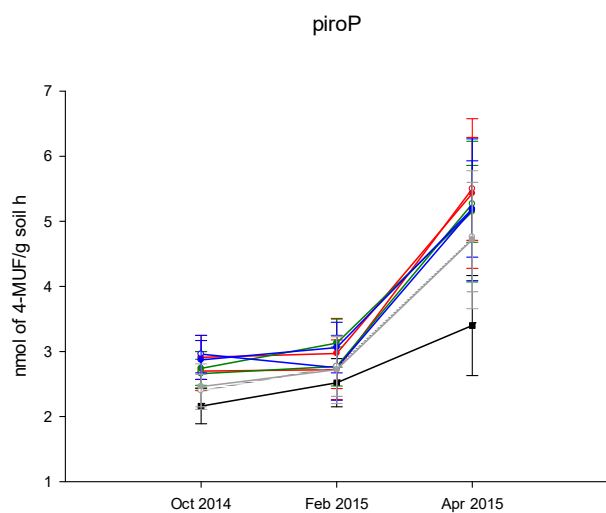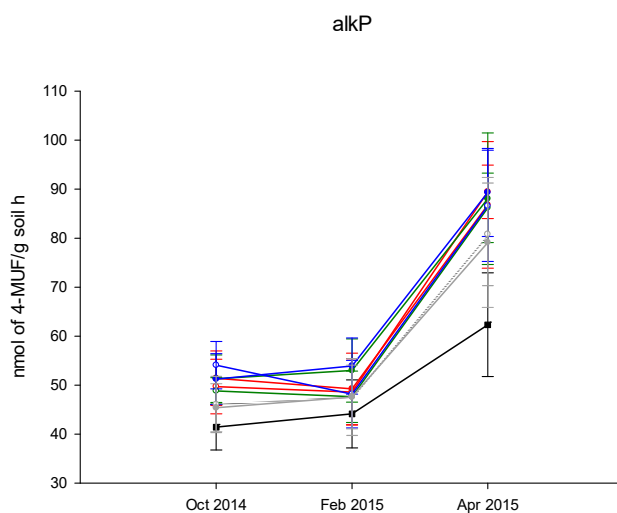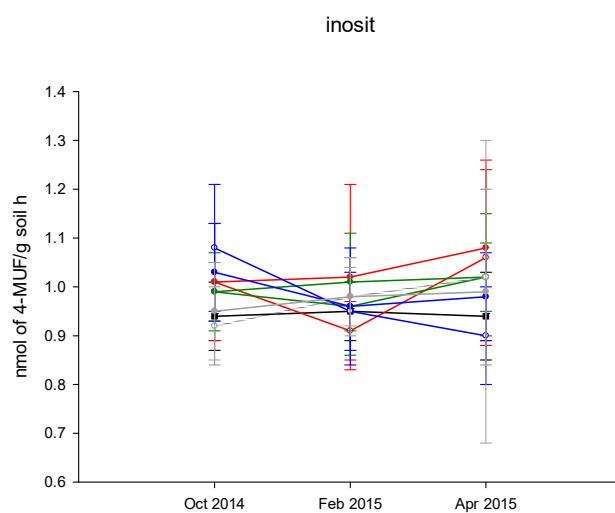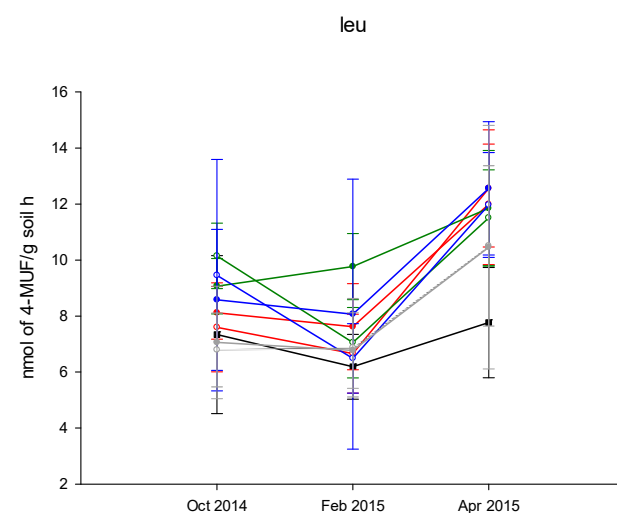

**Table S1** Sum of Square, F model and P adjusted values of Pairwise tests. Asterisks indicate significant differences (\*\*\* P < 0.001, \*\* P < 0.01, \* P < 0.05).

| Pairs               | Sum of square | F model | Significance |
|---------------------|---------------|---------|--------------|
| <b>October 2014</b> |               |         |              |
| Cnt vs BWcom15      | 0.007         | 9.57    | *            |
| Cnt vs BWcom30      | 0.010         | 13.85   | *            |
| Cnt vs BMan30       | 0.005         | 9.35    | *            |
| Cnt vs BMan15       | 0.004         | 6.84    | *            |
| Cnt vs OPCmix15     | 0.008         | 10.73   | *            |
| Cnt vs OPCmix30     | 0.013         | 18.42   | *            |
| Cnt vs OPC30        | 0.014         | 17.51   | *            |
| Cnt vs OPC15        | 0.014         | 20.78   | *            |
| BWcom30 vs BMan30   | 0.009         | 12.21   | *            |
| BWcom30 vs BMan15   | 0.008         | 10.01   | *            |
| BMan30 vs OPCmix15  | 0.006         | 9.45    | *            |
| BMan30 vs OPCmix30  | 0.007         | 10.64   | *            |
| BMan30 vs OPC30     | 0.012         | 16.67   | *            |
| BMan30 vs OPC15     | 0.010         | 17.49   | *            |
| BMan15 vs OPCmix15  | 0.006         | 7.91    | *            |
| BMan15 vs OPCmix30  | 0.007         | 10.38   | *            |
| BMan15 vs OPC30     | 0.010         | 14.95   | *            |
| BMan15 vs OPC15     | 0.010         | 14.95   | *            |
| <b>April 2015</b>   |               |         |              |
| Cnt vs BWcom15      | 0.08          | 55.99   | *            |
| Cnt vs BWcom30      | 0.08          | 49.42   | *            |
| Cnt vs BMan15       | 0.04          | 25.13   | *            |
| Cnt vs OPCmix15     | 0.07          | 48.16   | *            |
| Cnt vs OPCmix30     | 0.07          | 54.55   | *            |
| Cnt vs OPC30        | 0.08          | 52.91   | *            |
| Cnt vs OPC15        | 0.05          | 30.97   | *            |

**Table S2** Result of RM-ANOVA on biological parameters for “Sampling time” and the combination “Organic amendment x Dose”. Different letters indicate significant differences ( $\alpha = 0.05$ ) among the treatments in each sampling time.

| October<br>2014  |       |      |       |      |     |      |       |      |        |     |
|------------------|-------|------|-------|------|-----|------|-------|------|--------|-----|
| Treatments       | dsDNA | AryS | betaG | chit | acP | bisP | piroP | alkP | inosit | leu |
| CNT              | d     | c    | c     | b    | abc | b    | c     | c    | b      | ab  |
| BMan15           | bcd   | bc   | c     | ab   | c   | ab   | bc    | bc   | b      | b   |
| BMan30           | cd    | abc  | bc    | ab   | bc  | b    | abc   | bc   | ab     | b   |
| BWCom15          | abc   | abc  | bc    | ab   | abc | a    | ab    | ab   | ab     | ab  |
| BWCom30          | abc   | a    | bc    | ab   | a   | ab   | ab    | ab   | ab     | ab  |
| OPC15            | abc   | a    | ab    | ab   | abc | a    | a     | a    | a      | ab  |
| OPC30            | a     | a    | ab    | a    | abc | a    | ab    | ab   | ab     | ab  |
| OPCmix15         | a     | abc  | abc   | ab   | abc | ab   | abc   | ab   | ab     | a   |
| OPCmix30         | ab    | ab   | a     | ab   | ab  | a    | ab    | ab   | ab     | ab  |
| February<br>2015 |       |      |       |      |     |      |       |      |        |     |
| Treatments       | dsDNA | AryS | betaG | chit | acP | bisP | piroP | alkP | inosit | leu |
| CNT              | b     | cd   | c     | a    | a   | a    | b     | b    | a      | b   |
| BMan15           | ab    | d    | abc   | a    | a   | a    | ab    | ab   | a      | b   |
| BMan30           | ab    | abcd | abc   | a    | a   | a    | ab    | ab   | a      | b   |
| BWCom15          | ab    | abcd | bc    | a    | a   | a    | ab    | ab   | a      | b   |
| BWCom30          | ab    | ab   | abc   | a    | a   | a    | ab    | ab   | a      | ab  |
| OPC15            | ab    | bcd  | abc   | a    | a   | a    | ab    | ab   | a      | b   |
| OPC30            | ab    | a    | ab    | a    | a   | a    | ab    | a    | a      | ab  |
| OPCmix15         | a     | abcd | abc   | a    | a   | a    | ab    | ab   | a      | ab  |
| OPCmix30         | a     | abc  | a     | a    | a   | a    | a     | a    | a      | a   |
| April 2015       |       |      |       |      |     |      |       |      |        |     |
| Treatments       | dsDNA | AryS | betaG | chit | acP | bisP | piroP | alkP | inosit | leu |
| CNT              | b     | c    | c     | b    | c   | d    | b     | a    | ab     | b   |
| BMan15           | ab    | b    | bc    | a    | b   | bc   | a     | a    | ab     | ab  |
| BMan30           | ab    | ab   | b     | a    | ab  | c    | a     | a    | ab     | ab  |

|          |    |    |    |    |    |     |   |   |    |   |
|----------|----|----|----|----|----|-----|---|---|----|---|
| BWCom15  | a  | ab | ab | a  | a  | a   | a | a | a  | a |
| BWCom30  | a  | a  | ab | a  | ab | abc | a | a | a  | a |
| OPC15    | ab | ab | ab | a  | ab | ab  | a | a | b  | a |
| OPC30    | a  | a  | ab | a  | ab | abc | a | a | ab | a |
| OPCmix15 | a  | ab | ab | ab | ab | ab  | a | a | ab | a |
| OPCmix30 | a  | ab | a  | a  | ab | abc | a | a | ab | a |

Legend: dsDNA = Double strand DNA, AryS = arylsulfatase activity, betaG =  $\beta$ -glucosidase activity, chit = chitinase activity, acP and alkP = acid- and alkaline-phosphomonoesterase, bisP = phosphodiesterase activity, piroP = pyrophosphate-phosphodiesterase, inosit = phytase activity, leu = leucine aminopeptidase activity. CNT = Control, BWcom15 and BWcom30 = biowaste compost 15 Mg ha<sup>-1</sup> and 30 Mg ha<sup>-1</sup>, OPCmix15 and OPCmix30 = mixed olive pomace compost 15 Mg ha<sup>-1</sup> and 30 Mg ha<sup>-1</sup>, OPC15 and OPC30 = Olive pomace compost 15 Mg ha<sup>-1</sup> and 30 Mg ha<sup>-1</sup>, BMan15 and BMan30 = buffalo manure 15 Mg ha<sup>-1</sup> and 30 Mg ha<sup>-1</sup>.
